# Supplementary material
Source: PubMed Central journal article supplement (PMC5719248)
Supplement: develop-144-158485-s1.pdf [file develop-144-158485-s1.pdf]

**Table S1. PCR primers for RT-qPCR analysis.**

| Gene                 | Strand | Sequence (5'→3')         |
|----------------------|--------|--------------------------|
| Mouse <i>β-TrCP2</i> | F      | GAGTTCTGCACAGTCGGACA     |
| Mouse <i>β-TrCP2</i> | R      | GGTACCCAAGTCCCCTGCTA     |
| Mouse <i>Dmrt1</i>   | F      | CTCATACTACGGGCCTCCCT     |
| Mouse <i>Dmrt1</i>   | R      | TTCGAGCTCTCGTTGCTCAT     |
| Mouse <i>Stra8</i>   | F      | TTCCTGCGTGTTCACAAGT      |
| Mouse <i>Stra8</i>   | R      | ACTGGGTTGGTTGCCTTCTC     |
| Mouse <i>Arbp</i>    | F      | GGACCCGAGAAGACCTCCTT     |
| Mouse <i>Arbp</i>    | R      | GCACATCACTCAGAATTTCAATGG |

**Table S2. Commercially available antibodies used in the study.**

| Antigen                                          | Provider          | Catalog number |
|--------------------------------------------------|-------------------|----------------|
| SCP3 (1/200 dilution)                            | Abcam             | ab97672        |
| PLZF (1/200)                                     | Santa Cruz        | sc-22839       |
| DMC1 (1/200)                                     | Santa Cruz        | sc-22768       |
| SNAIL1 (1/1000)                                  | Cell Signaling    | 3895           |
| EM11 (1/200)                                     | Santa Cruz        | sc-50927       |
| STRA8 (1/500)                                    | Abcam             | ab49602        |
| DMRT1 (1/2000)                                   | Santa Cruz        | sc-377167      |
| Ubiquitin (1/200)                                | DAKO              | Z0458          |
| Hsp90 (1/2000)                                   | BD                | 610418         |
| BrdU (1/1000)                                    | BD                | 555627         |
| Myc tag (1/1000)                                 | Santa Cruz        | sc-40          |
| FLAG tag (1/2000)                                | Sigma             | F1804          |
| HA tag (1/500)                                   | Roche             | 11667475001    |
| HRP-conjugated anti-rabbit IgG (1/14000)         | Promega           | W4011          |
| HRP-conjugated anti-mouse IgG (1/14000)          | Promega           | W4021          |
| Alexa 546-conjugated anti-rabbit IgG<br>(1/1000) | Life Technologies | A-11035        |
| Alexa 488-conjugated anti-mouse IgG<br>(1/1000)  | Life Technologies | A-11001        |

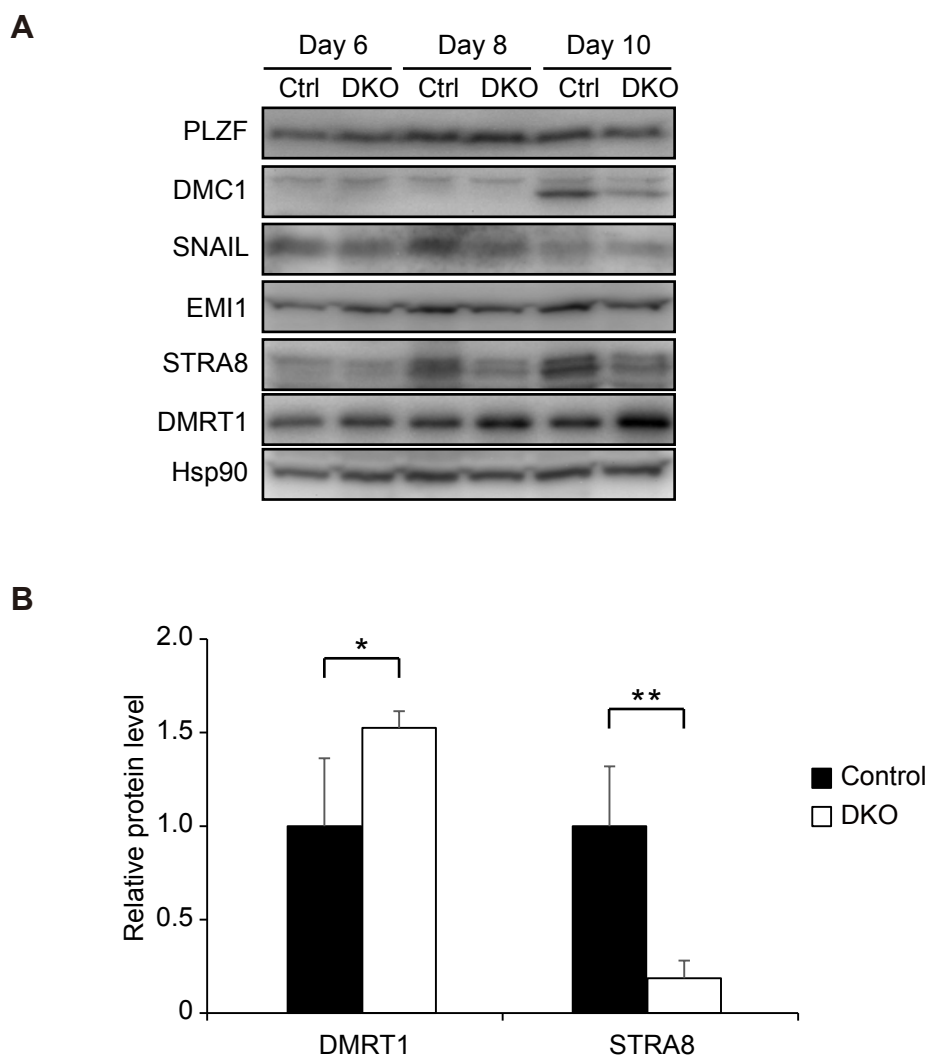

**Figure S1. Accumulation of DMRT1 and reduction of STRA8 in  $\beta$ -*TrCP1/2* DKO testes (related to Figure 5).**

(A) Immunoblot analysis of the indicated proteins in the testis of control (*Stra8-Cre*, Ctrl) and  $\beta$ -*TrCP1/2* DKO mice at the indicated ages. Hsp90 was examined as a loading control. (B) Quantification of band intensities of STRA8 and DMRT1 normalized by that of Hsp90 in Figure 5A measured with Image J software. \* $P < 0.05$  or \*\* $P < 0.01$  versus age-matched control (unpaired Student's *t* test).

**A**

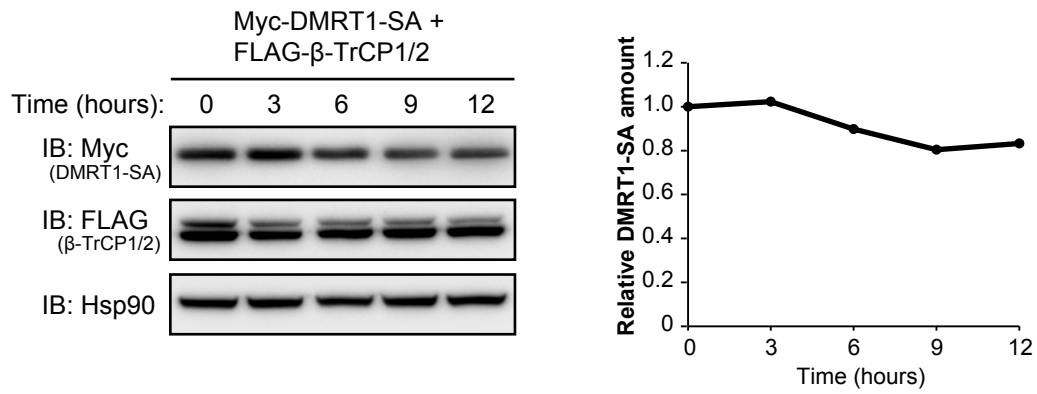

**B**

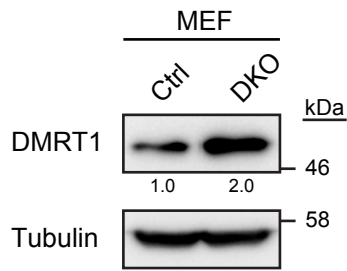

**C**

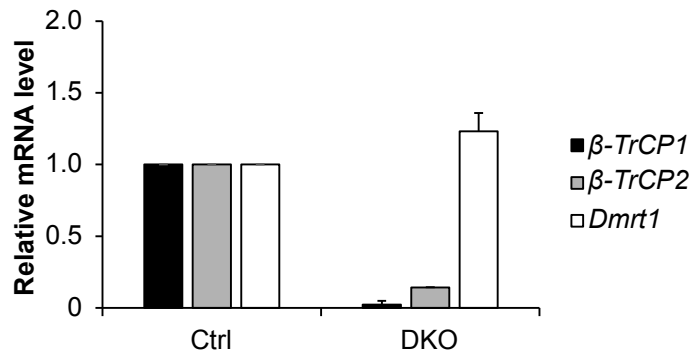

**D**

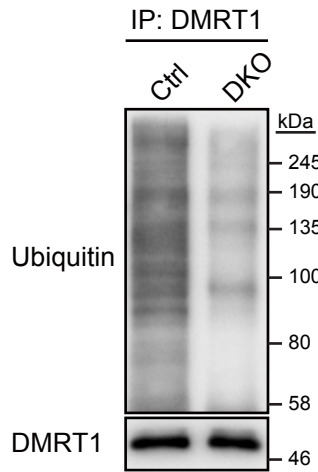

**Figure S2.  $\beta$ -TrCP1/2 ubiquitylate DMRT1 for degradation (related to Figure 6). (A)**

Cycloheximide chase analysis of the SA mutant of DMRT1 stability. 293T cells transfected with vectors for FLAG-tagged  $\beta$ -TrCP1 and  $\beta$ -TrCP2 as well as for Myc epitope-tagged SA mutant of DMRT1 were incubated with cycloheximide for the indicated times, lysed, and subjected to immunoblot analysis (IB) with the indicated antibodies. The band intensity for Myc-DMRT1 normalized by that of Hsp90 was quantified with Image J software. **(B)** Immunoblot analysis of the indicated proteins in the MEFs prepared from wild-type (Ctrl) or  $\beta$ -TrCP1<sup>-/-</sup>;  $\beta$ -TrCP2<sup>F/F</sup> (DKO) mice. MEFs were infected with retrovirus encoding DMRT1, selected by blasticidin, and then further infected with retrovirus encoding Cre. **(C)** RT-qPCR analysis of  $\beta$ -TrCP1,  $\beta$ -TrCP2 and *Dmrt1* mRNAs in the MEFs prepared as in **(B)**. Data are means  $\pm$  s.e.m. from two independent experiments. **(D)** In vivo ubiquitylation analysis of DMRT1. MEFs prepared as in **(B)** were treated with the proteasome inhibitor MG132 for 5 h, lysed, and subjected to immunoprecipitation (IP) with antibodies to DMRT1 under denaturing conditions followed by immunoblot analysis with antibodies to DMRT1 and to ubiquitin.

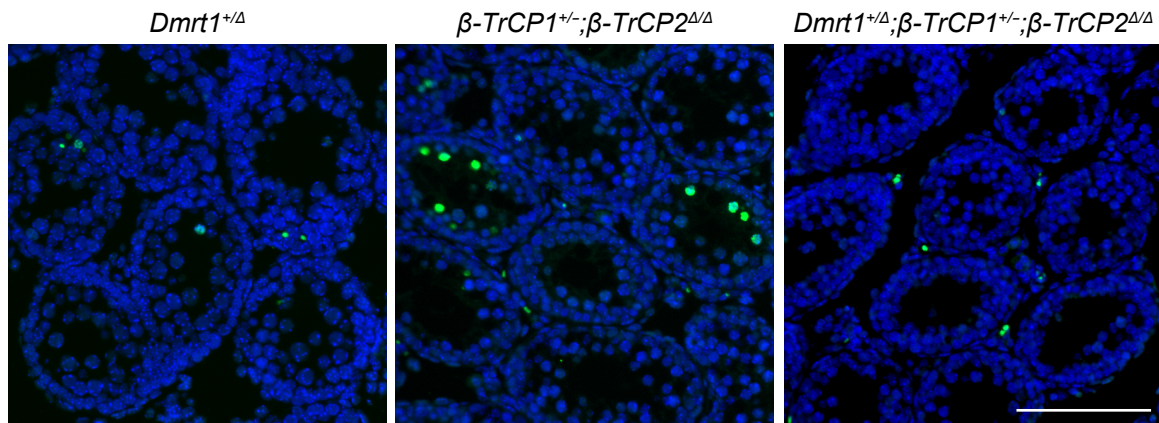

**Figure S3. Amelioration of apoptosis in  $\beta$ -TrCP-deficient mice by heterozygous deletion of *Dmrt1* (related to Figure 8).**

TUNEL staining of seminiferous tubules in mice of indicated genotypes at 14 dpp. Scale bars, 100  $\mu$ m. The percentage of TUNEL-positive tubules was presented in Figure 8D.

| Class     | Species                | Amino acid sequence   | NCBI reference   |
|-----------|------------------------|-----------------------|------------------|
| Mammals   | <i>H. sapiens</i>      | 326 PPSSQDSGLVSLSSSS  | NP_068770.2      |
|           | <i>M. musculus</i>     | 324 PPSSQDSGLVSLSSSS  | NP_056641.2      |
|           | <i>R. norvegicus</i>   | 324 PPSSQDSGLVSLSSSS  | NP_446158.1      |
| Reptile   | <i>A. carolinensis</i> | 308 PPSSQDSGLVSLSSSS  | XP_003216601.1   |
| Birds     | <i>G. gallus</i>       | 304 PPSSQDSGLGCLSSSE  | F1P5L6 (UniProt) |
|           | <i>C. livia</i>        | 238 PPSSQDSGLGCLSSSE  | XP_005507217.1   |
|           | <i>Z. albicollis</i>   | 226 PPNSQDSGLGCLSSSS  | XP_005488381.1   |
|           | <i>P. pubescens</i>    | 290 PASSQDSGLRCLSGSE  | XP_009900057.1   |
|           | <i>E. garzetta</i>     | 229 PPNSQDSGLGCLSSSE  | XP_009639798.1   |
|           | <i>C. canorus</i>      | 232 PPSSQDSGLGCLSSSE  | XP_009554449.1   |
| Amphibian | <i>X. tropicalis</i>   | 289 PPSSQDSGII SLSSNS | XP_002935648.2   |
| Fish      | <i>C. milli</i>        | 276 PSSSQDSGLI SLSSTS | XP_007890871.1   |
|           | <i>D. rerio</i>        | 226 SDGAQDSVSI SMIDA  | NP_991191.1      |
|           | <i>β-TrCP degnon</i>   | DSGxxS                |                  |

**Figure S4.  $\beta$ -TrCP degnon sequences in vertebrate DMRT1 orthologs (related to discussion).**

The amino acid sequences of DMRT1 orthologs were retrieved from the NCBI database (with the exception of that for *Gallus gallus* because of an apparent frameshift). The  $\beta$ -TrCP degnon is shaded, with the critical residues for association with  $\beta$ -TrCP indicated in red.
